# Supplementary material
Source: PubMed Central journal article supplement (PMC3146287)
Supplement: ismej2010210x1.pdf [file ismej2010210x1.pdf]

# **Two new subfamilies of DNA mismatch repair proteins (MutS) specifically abundant in the marine environment**

Hiroyuki Ogata<sup>1,\*</sup>, Jessica Ray<sup>2</sup>, Kensuke Toyoda<sup>3,†</sup>, Ruth-Anne Sandaa<sup>2</sup>, Keizo Nagasaki<sup>3</sup>,  
Gunnar Bratbak<sup>2</sup>, Jean-Michel Claverie<sup>1</sup>

1: Information Génomique et Structurale, CNRS-UPR2589, Institut de Microbiologie de la Méditerranée, Parc Scientifique de Luminy, Aix-Marseille Université, 163 Avenue de Luminy, Case 934, 13288 Marseille Cedex 9, France

2: Department of Biology, University of Bergen, PO Box 7800, N-5020 Bergen, Norway

3: Harmful Algal Bloom Division, National Research Institute of Inland Sea, Fisheries Research Agency, 2-17-5 Maruishi, Hatsukaichi, Hiroshima 739-0452, Japan

\*: Correspondence: Hiroyuki Ogata (E-mail: [Hiroyuki.Ogata@igs.cnrs-mrs.fr](mailto:Hiroyuki.Ogata@igs.cnrs-mrs.fr))

†: K. Toyoda's present address is "Department of Botany, Keio University, Hiyoshi, Kohoku-ku, Yokohama, Kanagawa 223-8521, Japan" (E-mail: [toyoda@diatom.jp](mailto:toyoda@diatom.jp))

## **Supplementary materials**

**Table S1. Primers used to resolve sequence ambiguities in the CeV MutS7 region.** Five sets of overlapping DNA primers were designed to resolve sequence ambiguities within a CeV contig containing a MutS7 homolog. Amplification reactions (50µl) contained 1X Hot Star Taq Plus Master Mix (Qiagen, Hilden, Germany), 0.4 µM each of forward and reverse primers, 0.2 mg ml<sup>-1</sup> BSA (Promega, Madison, Wisconsin), 3 mM MgCl<sub>2</sub> and 1X Coraload buffer (Qiagen). CeV lysates were diluted 10-fold with sterile MQ water and subjected to 2 x 2min incubation at 99°C with an intervening 2min incubation on ice. Template for PCR amplification reactions consisted of 2µl of the freeze-thaw diluted CeV lysate. The thermal cycling program consisted of an initial 5min denaturation at 95°C, 30 cycles of 95°C for 30sec, 55°C for 30sec and 72°C for 90sec, and a final 10min elongation at 72°C. When necessary, PCR products were stored overnight at 4°C until analysis by agarose gel electrophoresis to confirm amplification specificity. Correct molecular weight bands were excised from agarose gels and purified using the illustra GFX PCR purification kit (GE Healthcare, Amersham, UK) according to the manufacturer's protocol. 30-40ng of purified PCR product was used as template for forward and reverse sequencing reactions using the BigDye Terminator v3.1 cycle sequencing chemistry (Applied Biosystems, Carlsbad, California) and 3.2pmol primer. Sequencing was performed at the DNA Sequencing Facility at the University of Bergen, Norway.

| <b>Primer name</b> | <b>5'-3' sequence</b>       |
|--------------------|-----------------------------|
| cev_002_181-200    | TGGCCTGGGCCACCAAATCC        |
| cev_002_1010-989   | AAACAATGGGTGCGTGTCC         |
| cev_002_697-716    | TGGGGTAATCCAAATCCTGCCA      |
| cev_002_1807-1784  | ACTCACGTTTACCCATAGGTGTT     |
| cev_002_1779-1806  | TGTTTAACACCTATGGGTAAACGTGAG |
| cev_002_2844-2821  | ACCATTAATTCATAACCATTAGTCACC |
| cev_002_2388-2413  | ATAAGAGCGTGTCTTAGTCCCGT     |
| cev_002_3405-3379  | TTCCAGGAACTGAAAGTGATTCGGCA  |
| cev_002_3179-3204  | GCAACATTACAAGCAACAAAACGACG  |
| cev_002_3782-3756  | CCATACATACTTTCTCCAGCTCCTGGT |

**Table S2. MutS homologs in UniProt, girus genomes and NCBI/Env\_Nr.**

| <b>MutS subfamily</b> | <b>UniProt and girus MutS homologs</b> |          |         |           |       | <b>NCBI EnvNr</b> |
|-----------------------|----------------------------------------|----------|---------|-----------|-------|-------------------|
|                       | Total BLAST hits                       | Bacteria | Archaea | Eukaryota | Virus |                   |
| MutS1/MSH1            | 1803                                   | 1680     | 38      | 85        |       | 976               |
| MSH2                  | 176                                    |          |         | 176       |       | 7                 |
| MSH3                  | 102                                    |          |         | 102       |       | 4                 |
| MSH4                  | 93                                     |          |         | 93        |       |                   |
| MSH5                  | 103                                    |          |         | 103       |       | 2                 |
| MSH6/7                | 174                                    |          |         | 174       |       | 11                |
| plt-MSH1              | 29                                     |          |         | 29        |       | 4                 |
| MutS2                 | 1070                                   | 1037     |         | 33        |       | 237               |
| MutS3                 | 304                                    | 304      |         |           |       | 6                 |
| MutS4                 | 51                                     | 47       | 4       |           |       |                   |
| MutS5                 | 42                                     |          | 42      |           |       | 34                |
| MutS6                 | 24                                     | 24       |         |           |       | 5                 |
| MutS7                 | 28                                     | 8        |         | 15        | 5*    | 176               |
| MutS8                 | 4                                      | 2        |         |           | 2     | 106               |
| MutS9                 | 25                                     | 25       |         |           |       |                   |
| Total                 | 4028                                   | 3127     | 84      | 810       | 7     | 1568              |

\* A recently reported viral MutS7 (CroV MutS) is not included in this table.

**Table S3.** GOS reads related to MutS7/MutS8

| ID                  | Habitat Type | Geographic Location       | Sample Location              | Sample Depth (m) | Water Depth (m) | T (oC) | S (ppt) | Size Fraction (?m) | Chl a Sample Month (Annual±SE mg m-3) | Reads  | MutS7 Reads | MutS8 Reads |
|---------------------|--------------|---------------------------|------------------------------|------------------|-----------------|--------|---------|--------------------|---------------------------------------|--------|-------------|-------------|
| JCVI_SITE_GS000_S13 | Open Ocean   | Sargasso Sea              | Sargasso Sea, Station 13     | 5                | >4200           | 20     | 36.6    | 0.1-0.8            | 0.17<br>(0.09±0.02)                   | 644551 | 16          | 8           |
| JCVI_SITE_GS000_S13 | Open Ocean   | Sargasso Sea              | Sargasso Sea, Station 13     | 5                | >4200           | 20     | 36.6    | 0.22-0.8           | 0.17<br>(0.09±0.02)                   | 317180 | 16          | 8           |
| JCVI_SITE_GS000_S11 | Open Ocean   | Sargasso Sea              | Sargasso Sea, Station 11     | 5                | >4200           | 20.5   | 36.7    | 0.1-0.8            | 0.17<br>(0.09±0.02)                   | 644551 | 9           | 0           |
| JCVI_SITE_GS000_S11 | Open Ocean   | Sargasso Sea              | Sargasso Sea, Station 11     | 5                | >4200           | 20.5   | 36.7    | 0.22-0.8           | 0.17<br>(0.09±0.02)                   | 317180 | 9           | 0           |
| JCVI_SITE_GS000_S03 | Open Ocean   | Sargasso Sea              | Sargasso Sea, Station 3      | 5                | >4200           | 19.8   | 36.7    | 0.22-0.8           | 0.17<br>(0.09±0.02)                   | 368835 | 4           | 4           |
| JCVI_SITE_GS000_S13 | Open Ocean   | Sargasso Sea              | Sargasso Sea, Station 13     | 5                | >4200           | 20     | 36.6    | 0.22-0.8           | 0.17<br>(0.09±0.02)                   | 332240 | 16          | 8           |
| JCVI_SITE_GS001     | Open Ocean   | Sargasso Sea              | Sargasso Sea, Hydrostation S | 5                | >4200           | 22.9   | 36.7    | 3.0-20             | 0.10<br>(0.10±0.01)                   | 142352 | 8           | 4           |
| JCVI_SITE_GS001     | Open Ocean   | Sargasso Sea              | Sargasso Sea, Hydrostation S | 5                | >4200           | 22.9   | 36.7    | 0.8-3.0            | 0.10<br>(0.10±0.01)                   | 90905  | 8           | 4           |
| JCVI_SITE_GS001     | Open Ocean   | Sargasso Sea              | Sargasso Sea, Hydrostation S | 5                | >4200           | 22.9   | 36.7    | 0.1-0.8            | 0.10<br>(0.10±0.01)                   | 92351  | 8           | 4           |
| JCVI_SITE_GS002     | Coastal      | North American East Coast | Gulf of Maine                | 1                | 106             | 18.2   | 29.2    | 0.1-0.8            | 1.4<br>(1.12±0.19)                    | 121590 | 48          | 13          |
| JCVI_SITE_GS003     | Coastal      | North American East Coast | Browns Bank, Gulf of Maine   | 1                | 119             | 11.7   | 29.9    | 0.1-0.8            | 1.4<br>(1.12±0.19)                    | 61605  | 27          | 55          |
| JCVI_SITE_GS004     | Coastal      | North American East Coast | Outside Halifax, Nova Scotia | 2                | 142             | 17.3   | 28.3    | 0.1-0.8            | 0.4<br>(0.78±0.17)                    | 52959  | 4           | 0           |
| JCVI_SITE_GS005     | Embayment    | North American East Coast | Bedford Basin, Nova Scotia   | 1                | 64              | 15     | 30.2    | 0.1-0.8            | 6<br>(6.76±0.98)                      | 61131  | 5           | 3           |
| JCVI_SITE_GS006     | Estuary      | North American East Coast | Bay of Fundy, Nova Scotia    | 1                | 11              | 11.2   |         | 0.1-0.8            | 2.8<br>(1.87±0.18)                    | 59679  | 15          | 0           |
| JCVI_SITE_GS007     | Coastal      | North American East Coast | Northern Gulf of Maine       | 1                | 139             | 17.9   | 31.7    | 0.1-0.8            | 1.4<br>(1.12±0.19)                    | 50980  | 7           | 4           |
| JCVI_SITE_GS008     | Coastal      | North American East Coast | Newport Harbor, RI           | 1                | 12              | 9.4    | 26.5    | 0.1-0.8            | 2.2<br>(1.59±0.17)                    | 129655 | 6           | 0           |

Ogata et al., Table S3

|                 |               |                           |                                |      |      |      |      |         |                     |        |    |    |
|-----------------|---------------|---------------------------|--------------------------------|------|------|------|------|---------|---------------------|--------|----|----|
| JCVI_SITE_GS009 | Coastal       | North American East Coast | Block Island, NY               | 1    | 32   | 11   | 31   | 0.1-0.8 | 4.0<br>(2.72±0.24)  | 79303  | 10 | 6  |
| JCVI_SITE_GS010 | Coastal       | North American East Coast | Cape May, NJ                   | 1    | 10   | 12   | 31   | 0.1-0.8 | 2.0<br>(2.75±0.33)  | 78304  | 4  | 7  |
| JCVI_SITE_GS011 | Estuary       | North American East Coast | Delaware Bay, NJ               | 1    | 8    | 11   |      | 0.1-0.8 | 4.8<br>(9.23±1.02)  | 124435 | 22 | 10 |
| JCVI_SITE_GS012 | Estuary       | North American East Coast | Chesapeake Bay, MD             | 13.2 | 25   | 1    | 3.5  | 0.1-0.8 | 21.0<br>(15.0±1.01) | 126162 | 15 | 16 |
| JCVI_SITE_GS013 | Coastal       | North American East Coast | Off Nags Head, NC              | 2.1  | 20   | 9.3  |      | 0.1-0.8 | 3.0<br>(2.24±0.25)  | 138033 | 10 | 6  |
| JCVI_SITE_GS014 | Coastal       | North American East Coast | South of Charleston, SC        | 1    | 31   | 18.6 |      | 0.1-0.8 | 1.70<br>(1.92±0.25) | 128885 | 2  | 4  |
| JCVI_SITE_GS015 | Coastal       | Caribbean Sea             | Off Key West, FL               | 1.7  | 47   | 25   | 36   | 0.1-0.8 | 0.2<br>(0.27±0.09)  | 127362 | 15 | 4  |
| JCVI_SITE_GS016 | Coastal Sea   | Caribbean Sea             | Gulf of Mexico                 | 2    | 3333 | 26.4 | 35.8 | 0.1-0.8 | 0.16<br>(0.11±0.01) | 127122 | 12 | 8  |
| JCVI_SITE_GS017 | Open Ocean    | Caribbean Sea             | Yucatan Channel                | 2    | 4513 | 27   | 35.8 | 0.1-0.8 | 0.13<br>(0.09±0.01) | 257581 | 32 | 23 |
| JCVI_SITE_GS018 | Open Ocean    | Caribbean Sea             | Rosario Bank                   | 1.7  | 4470 | 27.4 | 35.4 | 0.1-0.8 | 0.14<br>(0.09±0.01) | 142743 | 6  | 2  |
| JCVI_SITE_GS019 | Coastal       | Caribbean Sea             | Northeast of Colón             | 1.7  | 3336 | 27.7 | 35.4 | 0.1-0.8 | 0.23<br>(0.15±0.02) | 135325 | 13 | 2  |
| JCVI_SITE_GS020 | Fresh Water   | Panama Canal              | Lake Gatun                     | 2    | 4.2  | 28.6 | 0.1  | 0.1-0.8 |                     | 296355 | 21 | 11 |
| JCVI_SITE_GS021 | Coastal       | Eastern Tropical Pacific  | Gulf of Panama                 | 1.6  | 76   | 27.6 | 30.7 | 0.1-0.8 | 0.50<br>(0.73±0.22) | 131798 | 3  | 4  |
| JCVI_SITE_GS022 | Open Ocean    | Eastern Tropical Pacific  | 250 miles from Panama City     | 2    | 2431 | 29.3 | 32.3 | 0.1-0.8 | 0.33<br>(0.28±0.02) | 121662 | 6  | 4  |
| JCVI_SITE_GS023 | Open Ocean    | Eastern Tropical Pacific  | 30 miles from Cocos Island     | 2    | 1139 | 28.7 | 32.6 | 0.1-0.8 | 0.07<br>(0.19±0.02) | 133051 | 4  | 8  |
| JCVI_SITE_GS025 | Fringing Reef | Eastern Tropical Pacific  | Dirty Rock, Cocos Island       | 1.1  | 30   | 28.3 | 31.4 | 0.8-3.0 | 0.11<br>(0.19±0.01) | 120671 | 0  | 4  |
| JCVI_SITE_GS026 | Open Ocean    | Galapagos Islands         | 134 miles NE of Galapagos      | 2    | 2386 | 27.8 | 32.6 | 0.1-0.8 | 0.22<br>(0.28±0.02) | 102708 | 0  | 2  |
| JCVI_SITE_GS027 | Coastal       | Galapagos Islands         | Devil's Crown, Floreana Island | 2.2  | 2.3  | 25.5 | 34.9 | 0.1-0.8 | 0.40<br>(0.38±0.03) | 222080 | 16 | 2  |
| JCVI_SITE_GS028 | Coastal       | Galapagos Islands         | Coastal Floreana               | 2    | 156  |      |      | 0.1-0.8 | 0.35<br>(0.35±0.02) | 189052 | 17 | 11 |

Ogata et al., Table S3

|                 |                   |                          |                                                      |     |       |      |      |         |                     |        |    |    |
|-----------------|-------------------|--------------------------|------------------------------------------------------|-----|-------|------|------|---------|---------------------|--------|----|----|
| JCVI_SITE_GS029 | Coastal           | Galapagos Islands        | North James Bay, Santiago Island                     | 2.1 | 12    | 26.2 | 34.5 | 0.1-0.8 | 0.40<br>(0.39±0.03) | 131529 | 4  | 4  |
| JCVI_SITE_GS030 | Warm Seep         | Galapagos Islands        | Warm seep, Roca Redonda                              | 19  | 19    | 26.9 |      | 0.1-0.8 |                     | 359152 | 2  | 2  |
| JCVI_SITE_GS031 | Coastal upwelling | Galapagos Islands        | Upwelling, Fernandina Island                         | 12  | 19.6  | 18.6 |      | 0.1-0.8 | 0.35<br>(0.39±0.03) | 436401 | 25 | 12 |
| JCVI_SITE_GS032 | Mangrove          | Galapagos Islands        | Mangrove on Isabella Island                          | 0.1 | 1.6   | 25.4 |      | 0.1-0.8 |                     | 148018 | 19 | 2  |
| JCVI_SITE_GS033 | Hypersaline       | Galapagos Islands        | Punta Cormorant, Hypersaline Lagoon, Floreana Island | 0.2 | 0.3   | 37.6 | 63.4 | 0.1-0.8 |                     | 692255 | 8  | 3  |
| JCVI_SITE_GS034 | Coastal           | Galapagos Islands        | North Seamore Island                                 | 2.1 | 35    | 27.5 |      | 0.1-0.8 | 0.36<br>(0.35±0.02) | 134347 | 12 | 4  |
| JCVI_SITE_GS035 | Coastal           | Galapagos Islands        | Wolf Island                                          | 1.7 | 71    | 21.8 | 34.5 | 0.1-0.8 | 0.28<br>(0.31±0.02) | 140814 | 2  | 2  |
| JCVI_SITE_GS036 | Coastal           | Galapagos Islands        | Cabo Marshall, Isabella Island                       | 2.1 | 67    | 25.8 | 34.6 | 0.1-0.8 | 0.65<br>(0.45±0.05) | 77538  | 4  | 0  |
| JCVI_SITE_GS037 | Open Ocean        | Eastern Tropical Pacific | Equatorial Pacific TAO Buoy                          | 1.8 | 3334  | 28   |      | 0.1-0.8 | 0.21<br>(0.24±0.02) | 65670  | 0  | 6  |
| JCVI_SITE_GS038 | Open Ocean        | Tropical South Pacific   | Tropical South Pacific                               | 1.8 | >4000 | 28.4 |      | 0.1-0.8 |                     | 741    | 0  | 0  |
| JCVI_SITE_GS039 | Open Ocean        | Tropical South Pacific   | Tropical South Pacific                               | 2   | >4000 | 28.6 |      | 0.1-0.8 |                     | 759    | 0  | 0  |
| JCVI_SITE_GS040 | Open Ocean        | Tropical South Pacific   | Tropical South Pacific                               | 2.2 | >4000 | 27.8 |      | 0.1-0.8 |                     | 736    | 0  | 0  |
| JCVI_SITE_GS041 | Open Ocean        | Tropical South Pacific   | Tropical South Pacific                               | 2   | >4000 | 28   | 35   | 0.1-0.8 |                     | 678    | 0  | 0  |
| JCVI_SITE_GS042 | Open Ocean        | Tropical South Pacific   | Tropical South Pacific                               | 1.7 | >4000 | 27.6 |      | 0.1-0.8 |                     | 699    | 0  | 0  |
| JCVI_SITE_GS043 | Open Ocean        | Tropical South Pacific   | Tropical South Pacific                               | 1.9 | >4000 | 27.6 | 35.9 | 0.1-0.8 |                     | 711    | 0  | 0  |
| JCVI_SITE_GS044 | Open Ocean        | Tropical South Pacific   | 600 miles from F. Polynesia                          | 2   | >4000 | 27.6 |      | 0.1-0.8 |                     | 678    | 0  | 0  |
| JCVI_SITE_GS045 | Open Ocean        | Tropical South Pacific   | 400 miles from F. Polynesia                          | 1.7 | >4000 | 28.3 | 37   | 0.1-0.8 |                     | 730    | 0  | 0  |
| JCVI_SITE_GS046 | Open Ocean        | Tropical South Pacific   | 300 miles from F. Polynesia                          | 1.9 | >4000 | 28.7 | 35.3 | 0.1-0.8 |                     | 626    | 0  | 0  |

Ogata et al., Table S3

|                 |                  |                        |                             |     |      |      |      |         |  |        |   |   |
|-----------------|------------------|------------------------|-----------------------------|-----|------|------|------|---------|--|--------|---|---|
| JCVI_SITE_GS047 | Open Ocean       | Tropical South Pacific | 201 miles from F. Polynesia | 30  | 2400 | 28.6 | 37.3 | 0.1-0.8 |  | 66023  | 4 | 2 |
| JCVI_SITE_GS048 | Coral Reef       | Polynesia Archipelagos | Moorea, Cooks Bay           | 1.4 | 34   | 28.9 | 35.1 | 0.1-0.8 |  | 744    | 0 | 0 |
| JCVI_SITE_GS049 | Coastal          | Polynesia Archipelagos | Moorea, Outside Cooks Bay   | 1.4 | 900  | 28.8 | 32.6 | 0.1-0.8 |  | 735    | 0 | 0 |
| JCVI_SITE_GS050 | Coral Atoll      | Polynesia Archipelagos | Tikehau Lagoon              | 1.2 | 24   | 27.8 |      | 0.1-0.8 |  | 715    | 0 | 0 |
| JCVI_SITE_GS051 | Coral Reef Atoll | Polynesia Archipelagos | Rangirora Atoll             | 1   | 10   | 27.3 | 34.2 | 0.1-0.8 |  | 128982 | 4 | 0 |

## Legend for supplementary figures

**Figure S1. Multiple sequence alignment of HNH endonuclease domains of the MutS7 subfamily proteins.** The positions of four conserved residues around the endonuclease active site are marked by red triangles.

**Figure S2 Maximum likelihood phylogenetic tree of MutS family proteins.** The tree is based on the conserved MutS domain V sequences. The tree is mid-point rooted. Bootstrap values < 50% are not shown. Taxon names are composed of a MutS family name, a sequence identifier, a domain classification (B for Bacteria, A for Archaea, E for Eukaryote, V for Viruses), followed by the species name. Color code for branches are as follows: Bacteria (blue), Archaea (light blue), Eukaryotes (green), Giruses (Red). MutS subfamilies introduced in this study (MutS6, MutS7, MutS8, MutS9) are indicated in red.

**Figure S3 Domain architecture of MutS family proteins.** Sequence domains were identified using NCBI/Cdd profiles and PSI-BLAST (E-value<0.01). This diagram is drawn to scale. For MutS domains (I, II, III, IV, V), PSI-BLAST was used with four iterations. Identified domains were represented as follows: MutS domain I (pfam01624), light blue rectangle; MutS domain II (pfam05188), orange rectangle; MutS domain III (pfam05192), light green rectangle; MutS domain IV (pfam05190), dark green rectangle; MutS domain V (pfam00488), red rectangle; Smr domain (pfam01713), orange oval; GIY-YIG domain (pfam01541), pink oval; HNH domain (pfam01844), green oval. MSH1p corresponds to plant specific MSH1 (plt-MSH1).

**Figure S4. Multiple sequence alignment of the N-terminal part of the domain I sequences from MutS7 and *E. coli* MutS1.** The conserved “F(X)E” residues are highlighted by a red rectangle.

**Figure S5. Correspondence analysis of codon usages of MutS7 and MutS8 homologs.** The number of GOS environmental sequences is 176 for MutS7 and 106 for MutS8.



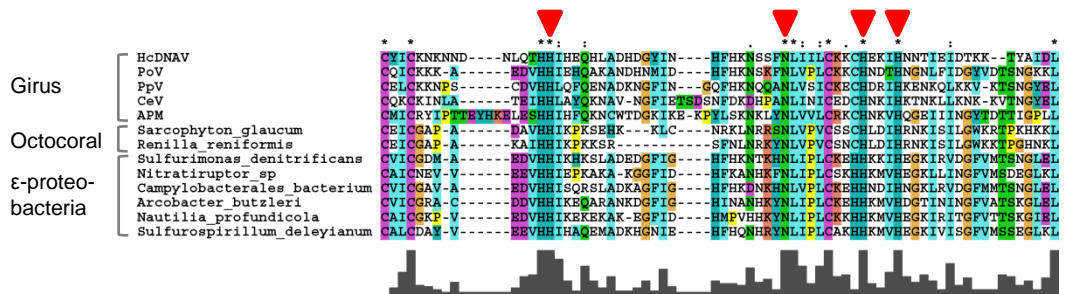

Fig. S1

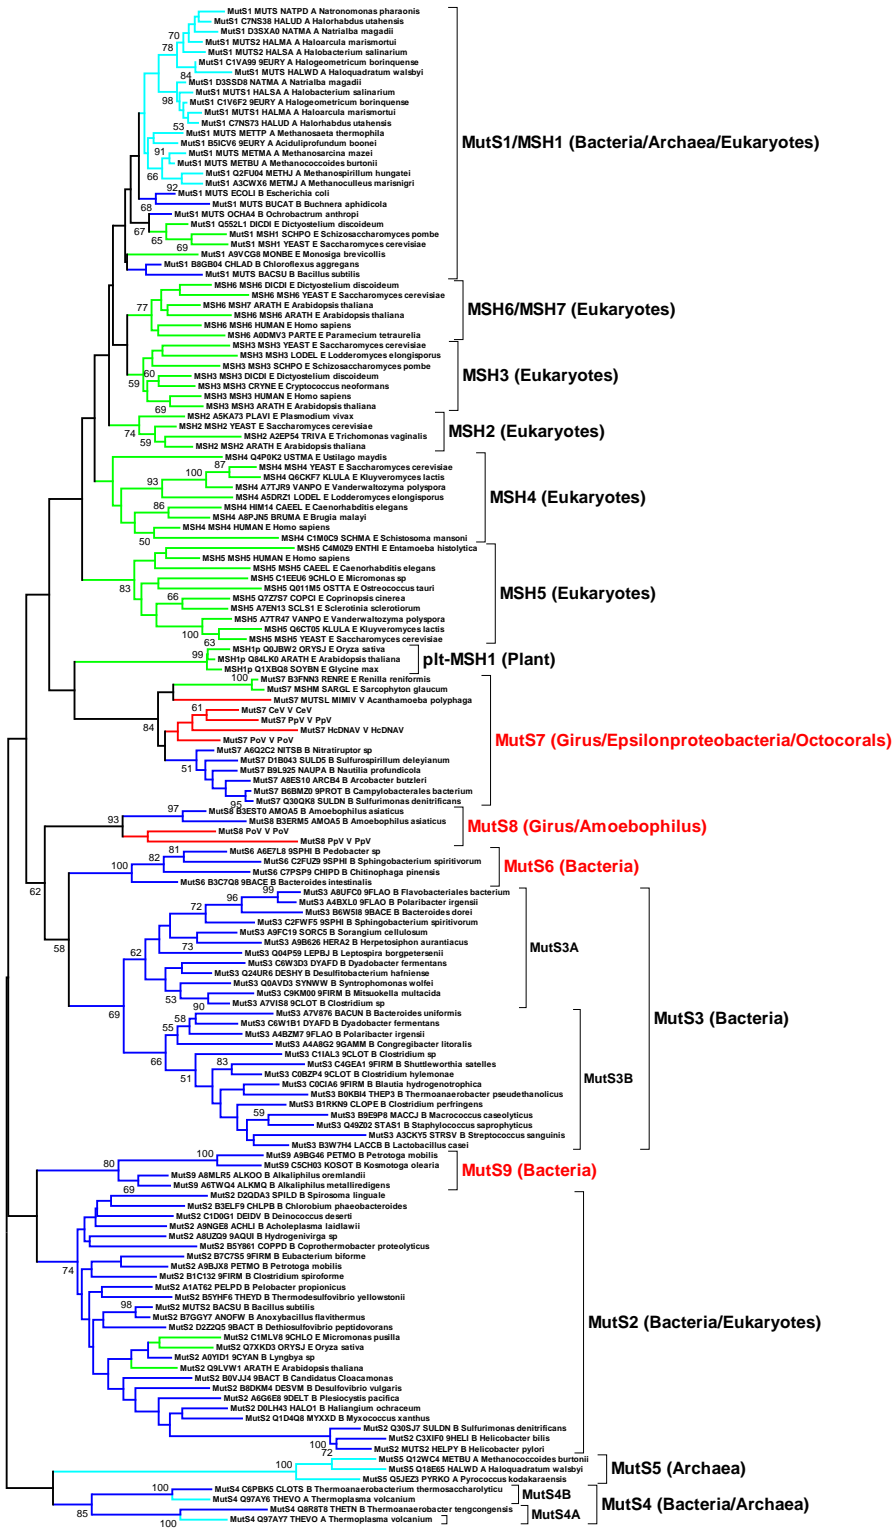

**Fig. S2**

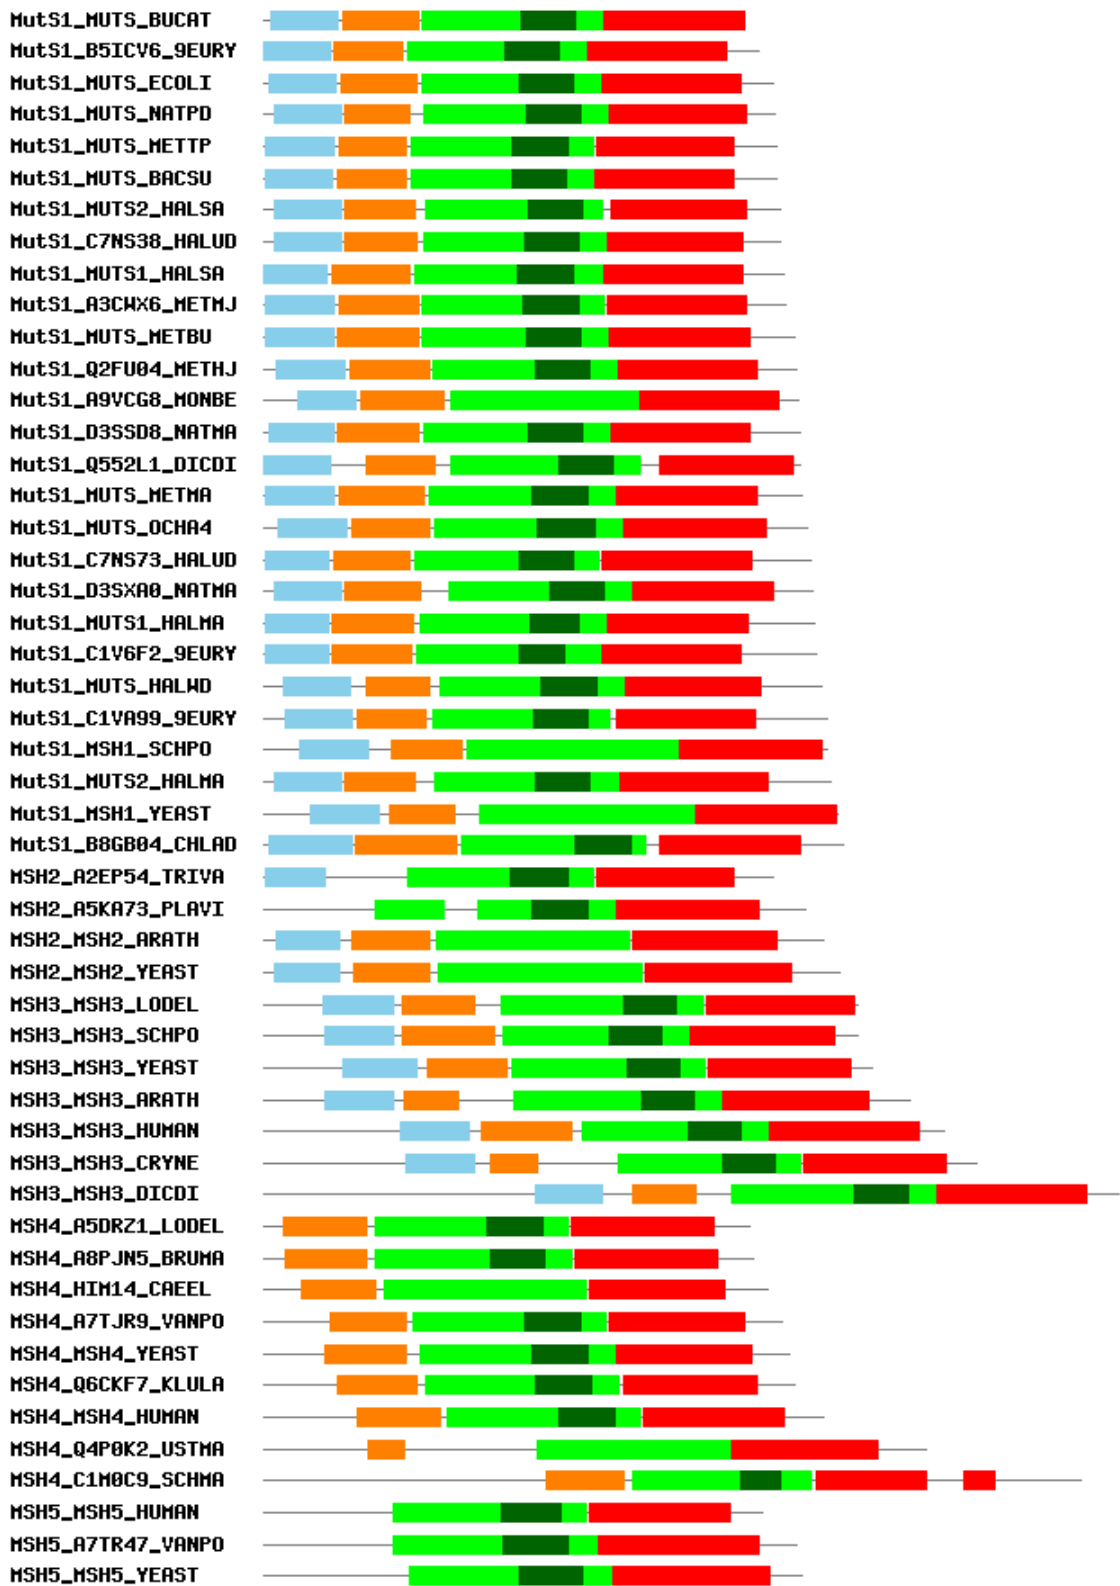

Fig. S3 (1/3)

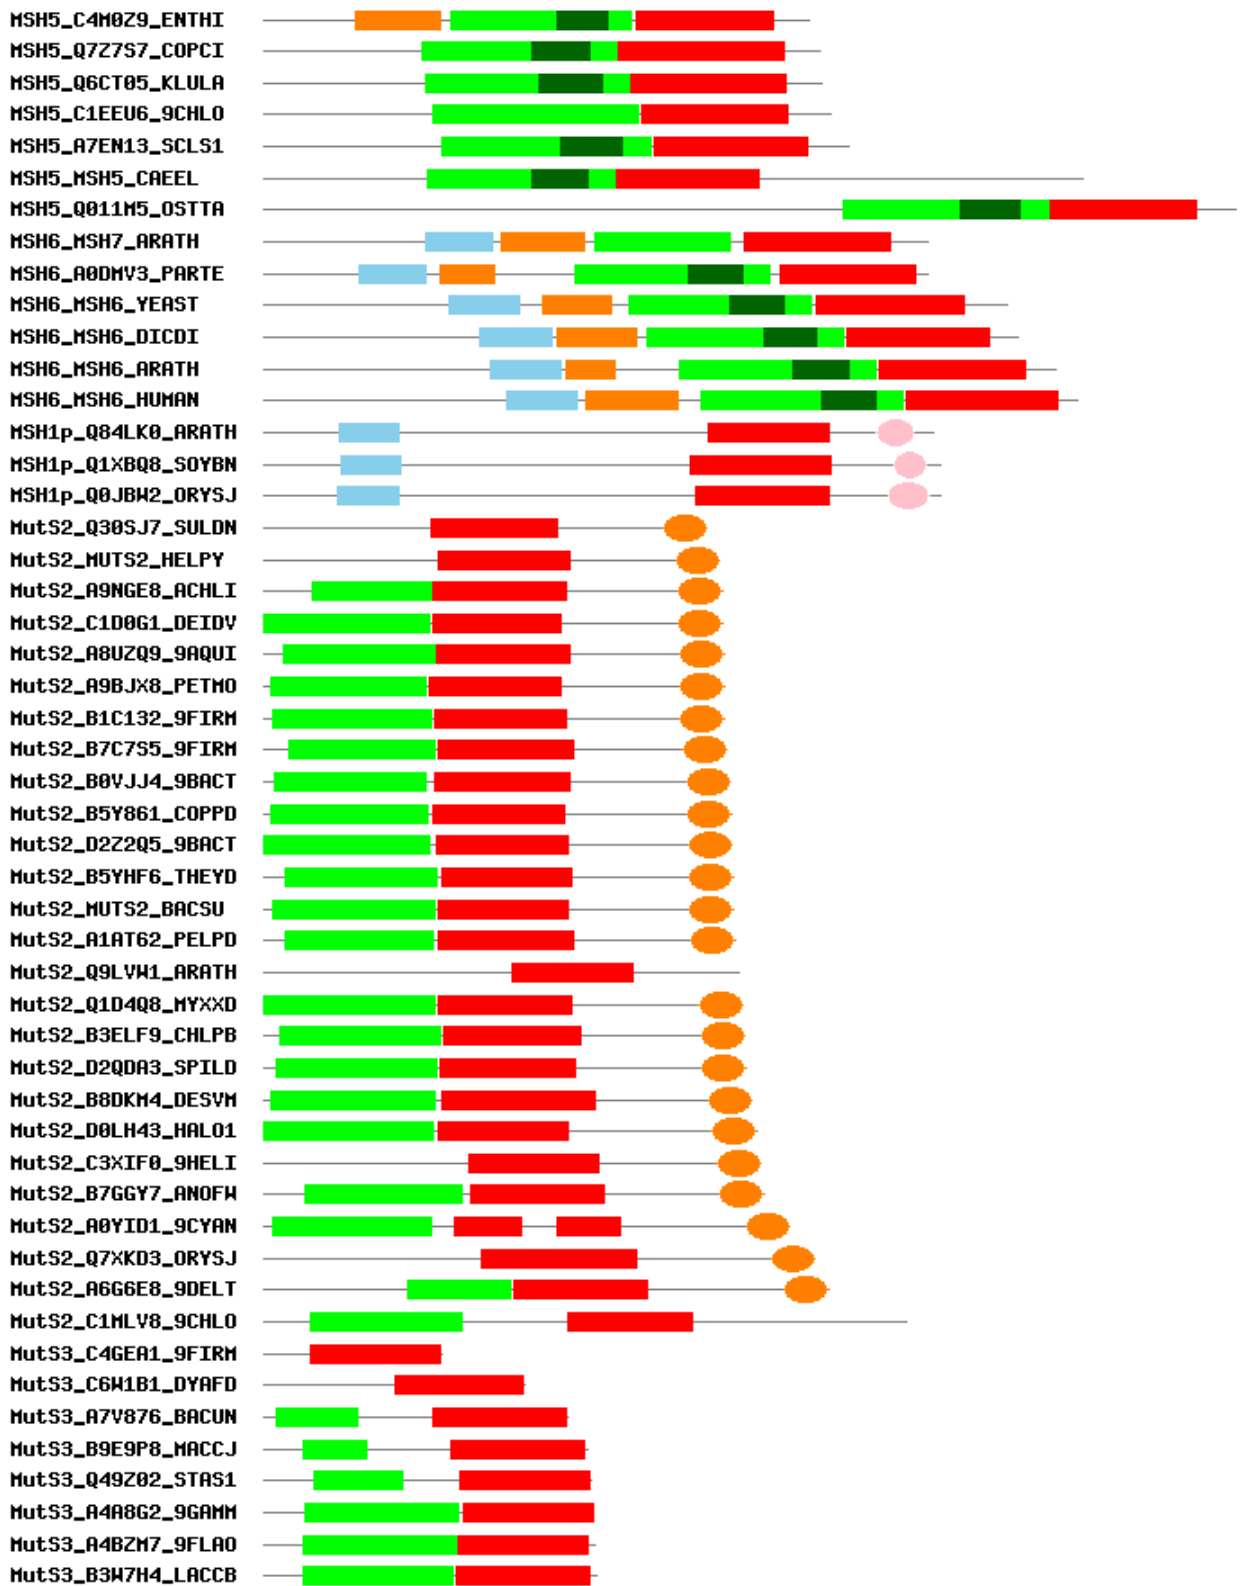

Fig. S3 (2/3)

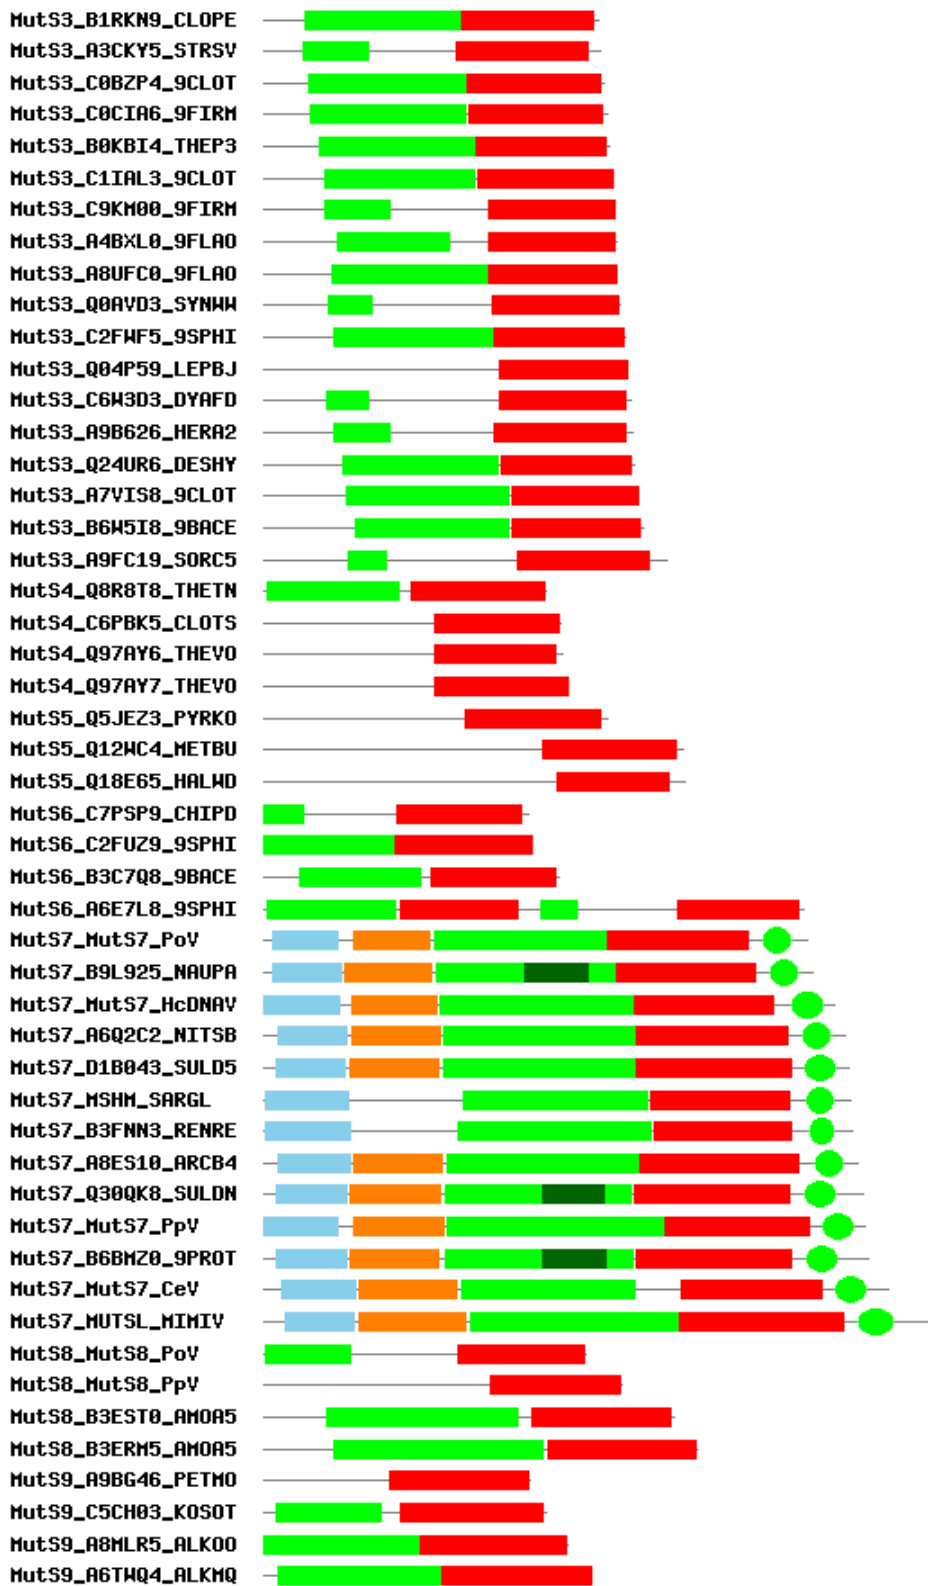

**Fig. S3 (3/3)**

```

*           :           *           : : : * * : :
MutS7_HcDNAV M-----TMLREYBELNLNLEKKYGKLSVILMEVGSFYEIINGVNTLKTNI-G-NI 47
MutS7_PoV M-----IYDDYVVYTEKKKSVYGDKTIVFIEIGSFPEIYGVNNDNVG-GANM 47
MutS7_PpV M-----SLISRYFDATRHHKRTNGEKTIVLIQVGSFPECYAMVEKDGSGSGSSI 49
MutS7_CeV MLQEMGNNGVRVHNLDFK-INLKRVCICXLMITVKEIYLDLTKKKEVGEKTLVLMQVGSFPEAYGLLDKDDIYGSDI 79
MutS7_APM MVSHLIFTDF--YKKFKRMKYSDSEDNKKETIYTYFTEKNAKIYGSKLVFQIGKFFVEAYCTRRK-GYV---NL 74
MutS7_MSHM_SARGL MN-----QITQYFNWMEENYSNYGLSVIQLIIGKFFVELWHEPDT-SSK-Q-QA 47
MutS7_B3FNN3_RENRE MS-----QITQYFNWMEENYSNYGLSVIQLIIGKFFVELWHEPDA-PCI-Q-QS 47
MutS7_A6Q2C2_NITSB MFDK-----EYLSNLLNDKKLLTQIYFDLQKYPEKLYGDNTVVLMEVGSFPEVVELNTPQEKI-G-KA 62
MutS7_D1B043_SULD5 MLEN-----IAKLLNSKELLTEIYFDLQKYPEKLYGKNTIVFMVEIGSFPEVVEVNNETHQI-G-KA 60
MutS7_B9L925_NAUPA MDI-----NKLAS-KKLLTEIYFDLQKYPVDSIYP-NAVVLMEVCTPFEVVEAG---GV-G-KA 52
MutS7_A8ES10_ARCB4 MDRSAKIV--R-EEVAELLENRGELLTIYFKLQKLPFKKYGGSNALVLMIECTPFEVVEVNNDEEKI-G-KA 67
MutS7_Q30QK8_SULDN MFSS-----DIDSILNNKDKLLTQIYFDLQKYPFKKYGKDTVVFIEICTPFEVVEVNNDEBQV-G-KA 61
MutS7_B6BMZ0_9PROT MLSS-----DVSSILNNKDKLLTQIYFDLQKYPFDKYGGSNTVVFVEICTPFEVVEVNNDEBQV-G-KA 61
MutS1_MUTS_ECOLI MSAIE-----NFDA-HTPMMQYLRLLK---AQHPETLLFVRMGDFYELFYDD---A 44
1.....10.....20.....30.....40.....50.....60.....70.....80

```

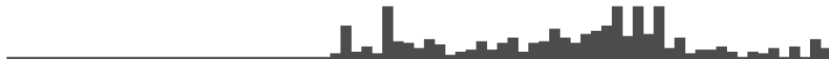

Fig. S4

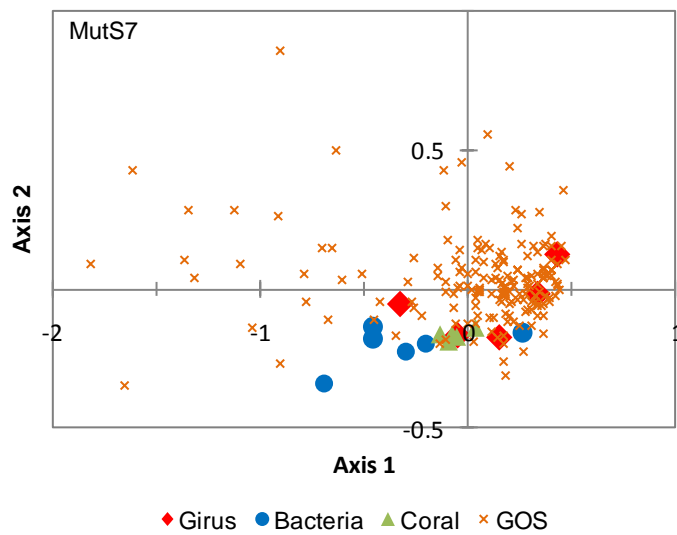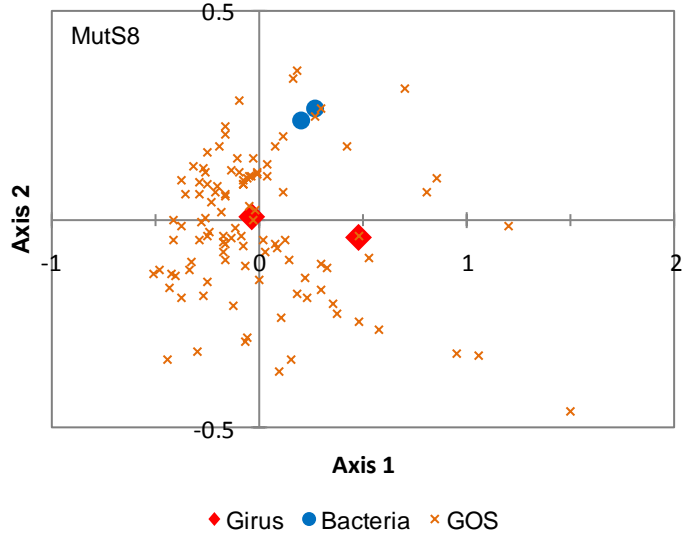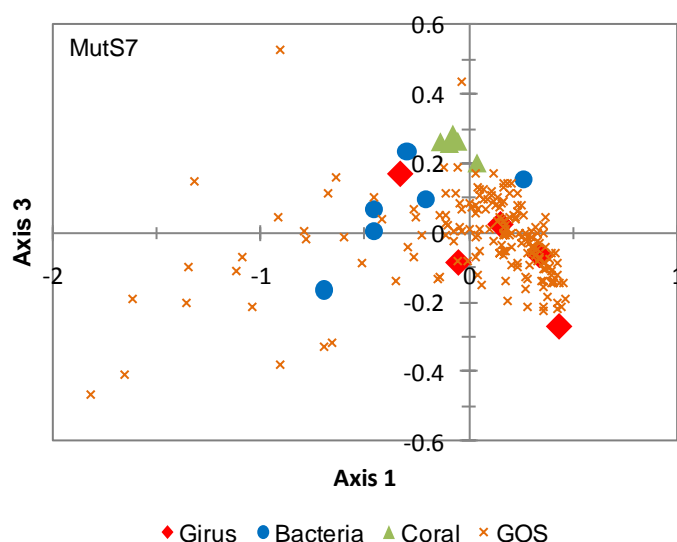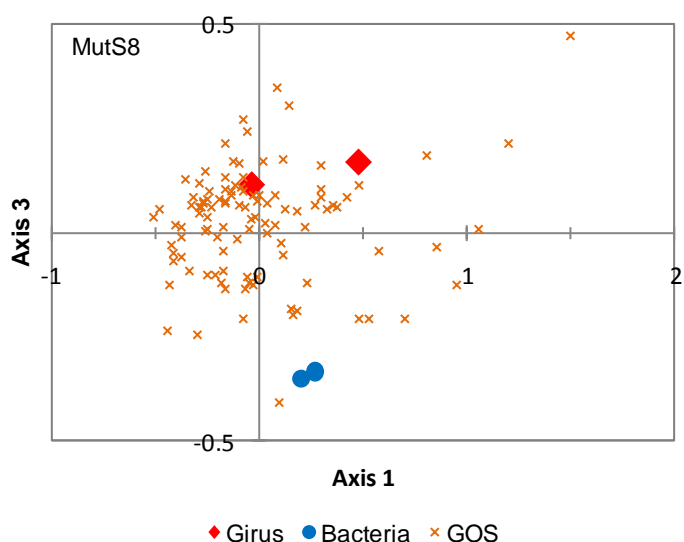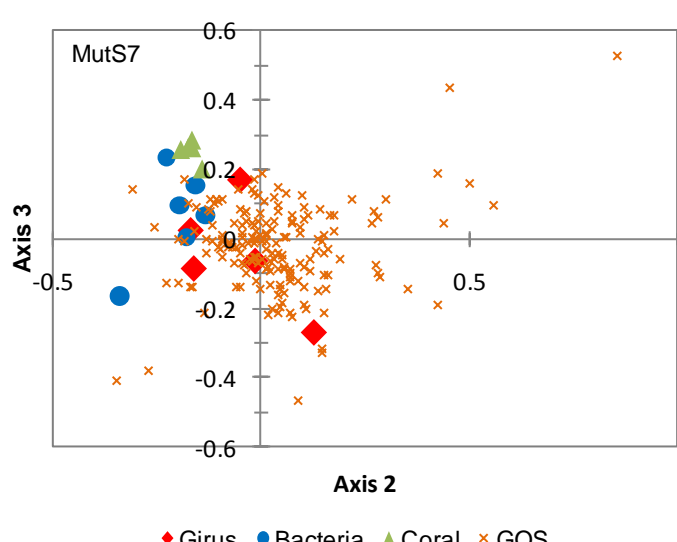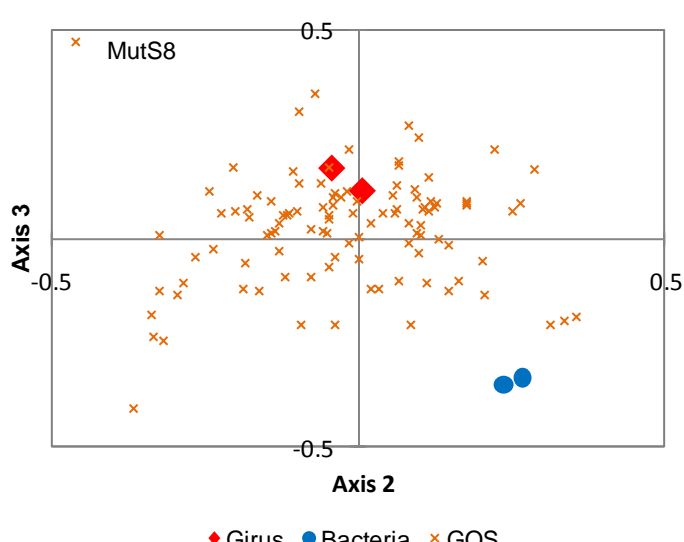

**Fig. S5**
